## RESEARCH ARTICLE

Experimental study on the effect of CO<sub>2</sub> injection on the permeability characteristics of reservoir sandstoneBing Liang, Yangqi Ma, Weiwei Sun<sup>\*</sup>, Xu Qin, Guotao Shi, Bo Liang

School of Mechanics and Engineering, Liaoning Technical University, Fuxin, Liaoning, China

<sup>\*</sup> [sunweiwei@lntu.edu.cn](mailto:sunweiwei@lntu.edu.cn)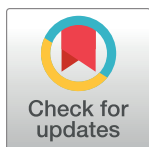

## OPEN ACCESS

**Citation:** Liang B, Ma Y, Sun W, Qin X, Shi G, Liang B (2025) Experimental study on the effect of CO<sub>2</sub> injection on the permeability characteristics of reservoir sandstone. PLoS ONE 20(1): e0317134. <https://doi.org/10.1371/journal.pone.0317134>

**Editor:** Kang Wang, Shenyang Jianzhu University, CHINA

**Received:** October 18, 2024

**Accepted:** December 20, 2024

**Published:** January 22, 2025

**Copyright:** © 2025 Liang et al. This is an open access article distributed under the terms of the [Creative Commons Attribution License](https://creativecommons.org/licenses/by/4.0/), which permits unrestricted use, distribution, and reproduction in any medium, provided the original author and source are credited.

**Data Availability Statement:** The data mentioned in the article has been uploaded to <https://datadryad.org/>. The website and data viewing download link are [http://datadryad.org/stash/share/ehGYUf2nYYG9Wnz68TKE55PZxOZiKDwpjbX2j\\_g3ygE](http://datadryad.org/stash/share/ehGYUf2nYYG9Wnz68TKE55PZxOZiKDwpjbX2j_g3ygE).

**Funding:** This work was supported by the Autonomous Region Science and Technology Major Project of Inner Mongolia (Grant No. 2021ZD0034-2 to WJS), and National Natural Science Foundation of China (Upper-level project (Research on mechanism of gas desorption

## Abstract

Using the Ordos Basin dry sandstone and sandstone saturated with different saline concentrations as research subjects, a self-developed constant temperature and pressure CO<sub>2</sub> injection simulation device was employed to conduct permeability tests on sandstone under varying effective stresses and CO<sub>2</sub> injection pressures. The test results indicated that during the CO<sub>2</sub> injection process, the permeability of dry sandstone was two orders of magnitude higher than that of sandstones saturated with different saline concentrations. When the effective stress increases from 10 MPa to 28 MPa, the fissure compressibility of reservoir sandstone is influenced by the saturation of different saline concentrations, with the compressibility coefficients for 0%, 15%, and 30% saline-saturated sandstone being 0.00495 MPa<sup>-1</sup>, 0.00614 MPa<sup>-1</sup>, and 0.01879 MPa<sup>-1</sup>, respectively. The primary reasons for the reduced permeability of sandstone are as follows: supercritical CO<sub>2</sub> lowers the mechanical properties of sandstone; high-concentration saline induces crystallization within the sandstone, resulting in a blockage effect. High-concentration saline increases the fissure compressibility of sandstone, decreases the permeability of the sandstone reservoir, and ultimately affects the injectability of the CO<sub>2</sub> in the reservoir.

## 1. Introduction

The international community has proposed a series of emission reduction measures in response to the greenhouse effect caused by carbon dioxide emissions. Among these, carbon capture, utilization, and storage (CCUS) has attracted widespread attention as a potential greenhouse gas reduction technology [1].

Carbon dioxide (CO<sub>2</sub>) sequestration technology achieves long-term isolation from the atmosphere by injecting CO<sub>2</sub> into suitable deep geological formations [2]. In practice, challenges remain regarding ensuring the effective storage and safety of CO<sub>2</sub> underground. Among the various stages of geological CO<sub>2</sub> sequestration, the permeability of sandstone reservoirs directly affects the distribution, migration, and storage effectiveness of CO<sub>2</sub>. Different temperature and pressure conditions can lead to changes in the CO<sub>2</sub> phase within the reservoir, thereby influencing the permeability characteristics of the sandstone. As gaseous CO<sub>2</sub>

promoted by hydraulic fracturing and hot water injection in high gas coal seam: 5247044130 to WJS) and National Natural Science Foundation of China (NSFC) Youth Fund Project (Grant No. 52304029 to WJS), and Project supported by the discipline innovation team of Liaoning Technical University (Grant No. LNTU20TD-11 to WJS). The funders had no role in study design, data collection and analysis, decision to publish, or preparation of the manuscript.

**Competing interests:** The authors have declared that no competing interests exist.

transitions to a supercritical state, its flow properties undergo fundamental changes, imposing new requirements on the storage capacity and stability of the sandstone reservoirs.

The efficient injection of CO<sub>2</sub> is a prerequisite for effective sequestration of CO<sub>2</sub>. Understanding the influence of CO<sub>2</sub> phase changes on the permeability of reservoir rocks is an effective way to enhance sequestration efficiency. Scholars, both domestically and internationally, have conducted extensive research on the CO<sub>2</sub> injection and flow processes in sandstone. Ni et al. [3] studied the effect of CO<sub>2</sub> injection on the permeability of coal reservoirs, finding that the impact of CO<sub>2</sub> injection on permeability follows a trend of initial decrease followed by an increase. Niu [4] found that CO<sub>2</sub> injection can reduce the mechanical properties of the coal matrix. Gao [5] established models for the relationship between porosity and permeability through CO<sub>2</sub> injection experiments. Li et al. [6] studied the deformation of rocks under different coaxial confining pressures by establishing a two-dimensional rock constitutive model. Ju et al. [7] combined yield theory and determined the true tensile yield strength of sandstone through experimental methods. Wang et al. [8, 9] studied the energy distribution of coal and rock after CO<sub>2</sub> fracturing and proposed a new damage calculation method after CO<sub>2</sub> fracturing, which provided theoretical support for the stability of the system after CO<sub>2</sub> fracturing. However, they did not consider the evolution of reservoir rock permeability after CO<sub>2</sub> injection. Hao [10, 11] established an evolution equation for the permeability of coal under different pressure gradients by conducting coal adsorption experiments. Liu [12] discovered through continuous injection experiments of supercritical CO<sub>2</sub> that continuous injection caused pore blockage, resulting in a 12.03% loss of porosity in the core samples. Liu [13] et al. constructed a microscopic gas-liquid permeation pathway using image analysis methods to evaluate the storage performance of CO<sub>2</sub>; Li et al. [14] studied the changes in gas concentration during the fracturing and displacement process of coal seams by injecting liquid CO<sub>2</sub>. Liu et al. [15, 16] and Sun et al. [17] studied the wettability of CO<sub>2</sub> during reservoir flow. Bai et al. [18] studied the distribution law of formation stress under supercritical CO<sub>2</sub> seepage based on finite element calculation method. Teng et al. [19] conducted experiments on CO<sub>2</sub> permeation in coal under different stable pressures and discussed the sensitivity of confining pressure to permeability.

However, most existing studies focus on a single lithology or injection mode, lacking comparative analysis of different types of reservoirs (e.g., low permeability sandstone and high permeability sandstone). The influence of different geological conditions (e.g., stress field, porosity, etc.) on permeability may be significantly different, which is rarely discussed in the existing literature. Some studies [20] have ignored the influence of the stress state in the reservoir and CO<sub>2</sub> injection interactions on permeability. In this study, CO<sub>2</sub> injection experiments were conducted closer to the actual reservoir conditions (e.g., formation temperature, pressure, and stress state) to more accurately reflect the influence of CO<sub>2</sub> injection on the permeability in an actual reservoir.

This study used sandstone from the Ordos Basin to conduct CO<sub>2</sub> injection sandstone experiments and compare the changes in rock permeability under different water saturation levels. The focus was on studying the effects of injection pressure and saline concentration on reservoir rock permeability during CO<sub>2</sub> injection to provide ideas for efficient CO<sub>2</sub> storage.

## 2. Materials and methods

### 2.1. Sample preparation

The experimental sandstone (Fig 1) was obtained from the National Energy Sensitive East No.1 Mine in the Hailar Development Zone, Hulunbuir City, Inner Mongolia Autonomous Region, at a burial depth of 850 m. According to the guiding principles of the International

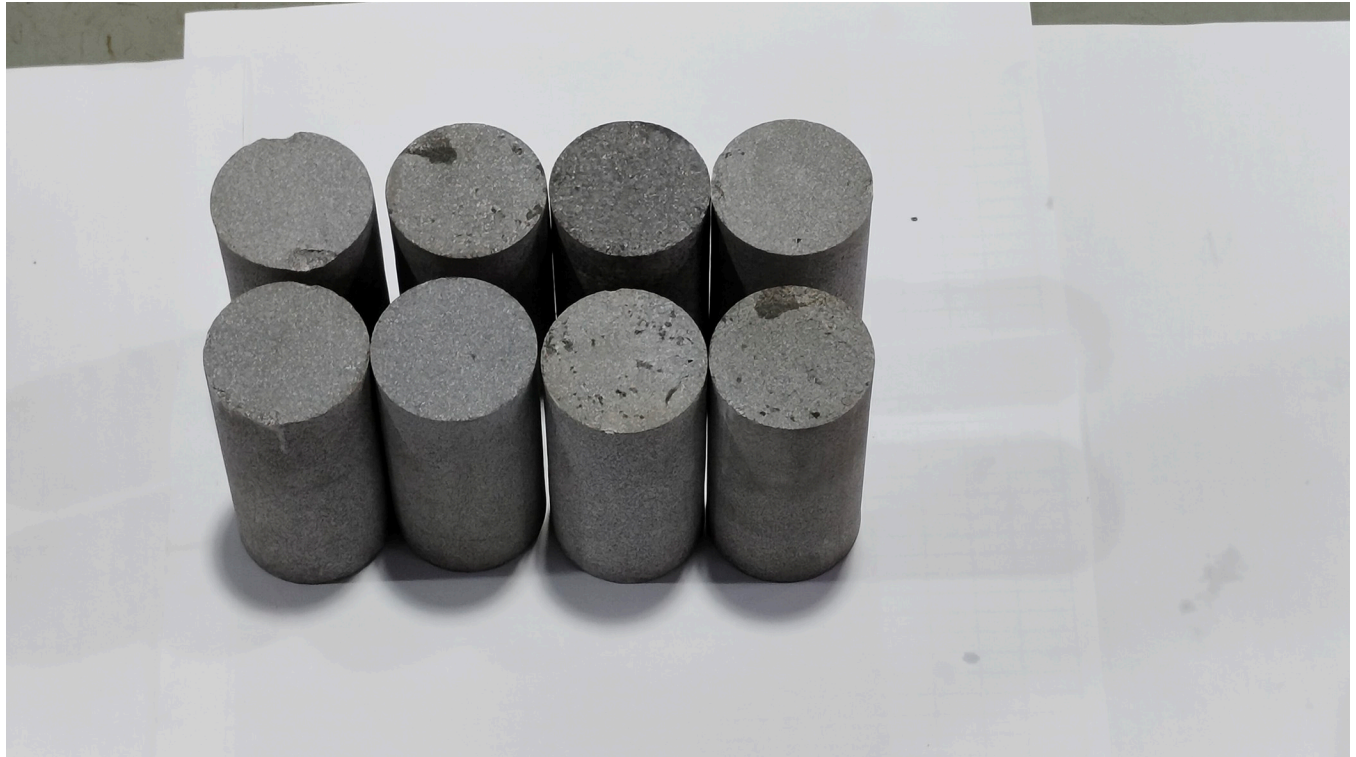

**Fig 1. Sandstone sample diagram.**

<https://doi.org/10.1371/journal.pone.0317134.g001>

Society for Rock Mechanics (ISRM) [21], the core was processed into standard cylindrical specimens with diameters of 50 mm and heights of 100 mm to ensure a smooth end face.

Three different concentrations of saltwater solutions, 0%, 15%, and 30% (saltwater mass ratio), were configured as vacuum-saturated (Fig 2) sandstone using a vacuum saturation device until the mass remained unchanged (Fig 3), and a set of dried sandstone was used as a control.

## 2.2. Test system

To accurately analyze the influence of phase changes on the permeability of sandstone during CO<sub>2</sub> injection, an advanced seepage experimental device was designed and used to conduct steady-state seepage experiments based on the different injection effects of gaseous and supercritical CO<sub>2</sub>. The experimental setup mainly consisted of a high-pressure injection module, a constant temperature bath, a sandstone core gripper, a pressure and flow monitoring system, and a data acquisition unit. The high-pressure injection module can simulate the high-pressure environment deep in the formation, compress CO<sub>2</sub> to a supercritical state, and ensure a stable CO<sub>2</sub> pressure throughout the entire experimental process. A constant temperature bath was used to maintain a constant ambient temperature around sandstone cores. The axial and confining pressure loading systems in the self-developed equipment are provided by the twin-cylinder constant speed constant pressure pump TC-100D, with a maximum pressure can reach 70MPa, and a flow adjustment range of 0.01 ~ 30 ml/min. The performance was significantly better than that of the Quiznix Q5000 precision metering pump (Chandler Engineering) with a maximum pressure of 15MPa in Main et al. [22].

The sandstone core holder is the core part of the experimental device, made of corrosion-resistant high-strength materials, capable of withstanding high-pressure injection of



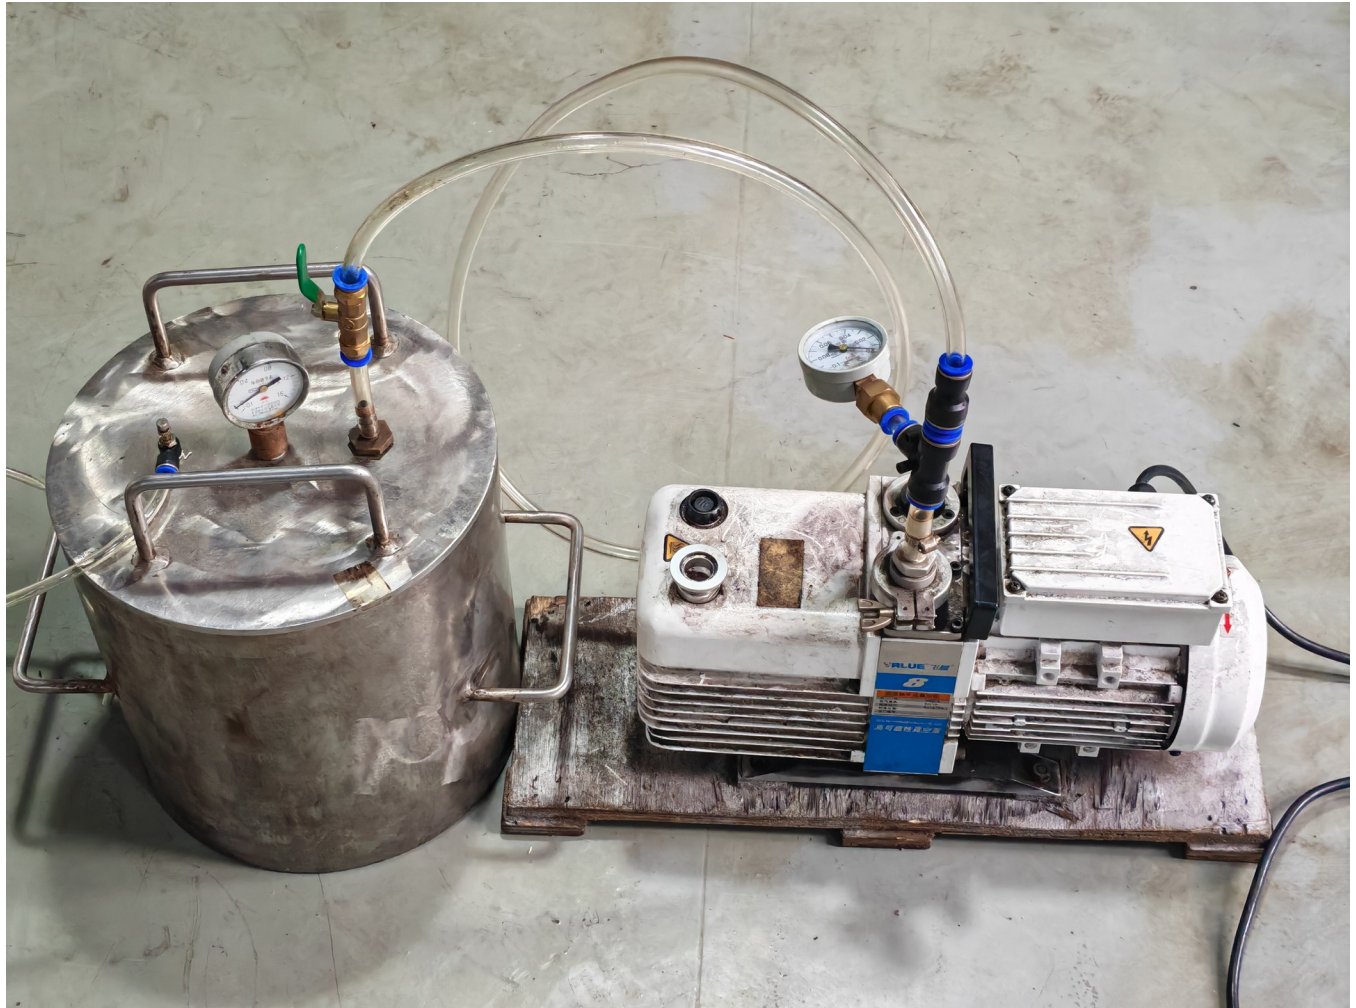

**Fig 2. Vacuum saturation equipment.**

<https://doi.org/10.1371/journal.pone.0317134.g002>

supercritical CO<sub>2</sub>, while ensuring the integrity of the core sample and achieving accurate permeability measurements. After the core was wrapped with Nitrile rubber heat shrink sleeve, a strain gauge was attached to the outside to measure the strain of the sandstone during the experiment. In order to isolate the strain gauge from the confining pressure loading medium oil, waterproof tape was tightly wrapped around the outside of the strain gauge. The arrangement of strain gauges is shown in Fig 4.

The entire gripper design required a high degree of sealing to eliminate the possibility of gas leakage and ensure the reliability of experimental data. The pressure and flow monitoring system monitored the pressure and CO<sub>2</sub> flow status in real-time during the experimental process through high-precision sensors. The data acquisition unit was responsible for recording all relevant parameters, including pressure, temperature, and flow rate, for subsequent data analysis. The experimental setup is shown in Fig 5.

## 2.3. Experimental methods and data processing

**2.3.1. Experimental steps.** In an experiment on the influence of CO<sub>2</sub> geological storage on sandstone permeability, the permeability measurement process is a crucial link, which directly affects the accuracy and reliability of the experimental results.

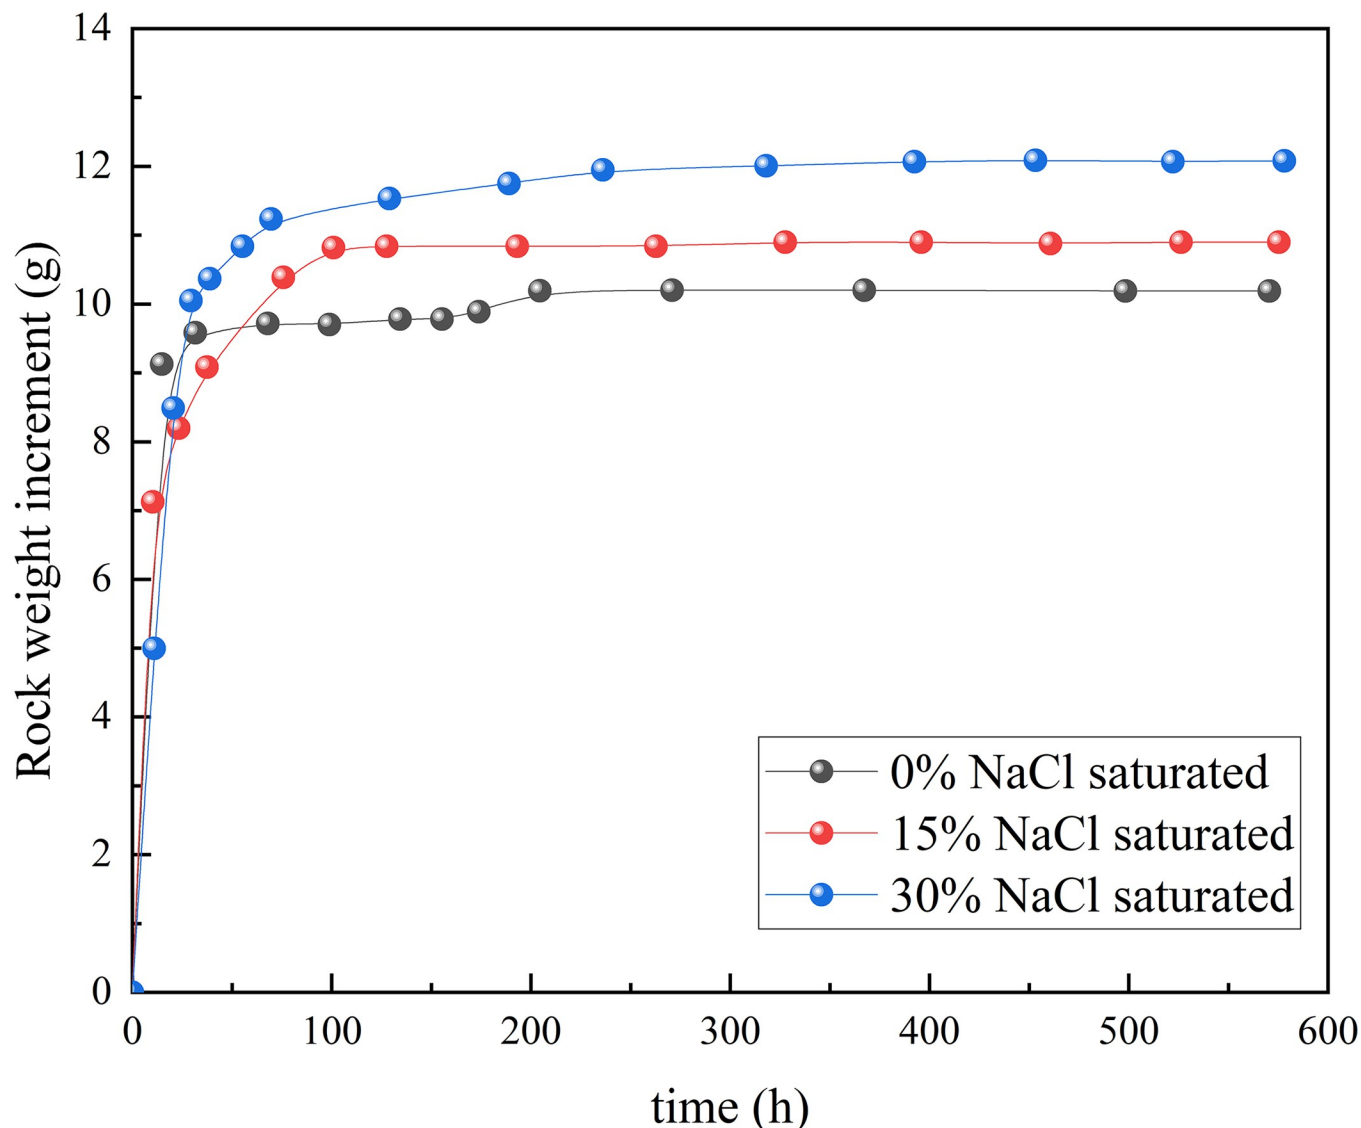

**Fig 3. Time-dependent curves of sandstone quality immersed in different concentrations of salt water.**

<https://doi.org/10.1371/journal.pone.0317134.g003>

The steady-state seepage experiment of the independently developed seepage device simulated the sandstone layer conditions at different depths of the geological environment by precisely controlling the injection pressure and temperature parameters, ensuring the realism and scientificity of the experiment. During the experiment, under simulated reservoir conditions, the sandstone sample was placed in a core clamp to ensure a sealed and high-pressure environment. Subsequently, CO<sub>2</sub> was injected into the sandstone sample through a high-precision pressure pump system. To ensure the accuracy of the permeability data, the steady-state flow method was used to test the initial permeability of the experimental samples. The strata 850 m underground in Mindong No. 1 Mine belongs to the sandstone layer, and some areas contain salt water in the sandstone, which not only provides a huge space for CO<sub>2</sub> geological storage, but also forms a good sealing condition. To study the seepage characteristics of the CO<sub>2</sub> injection process, CO<sub>2</sub> seepage experiments were conducted under different injection pressures

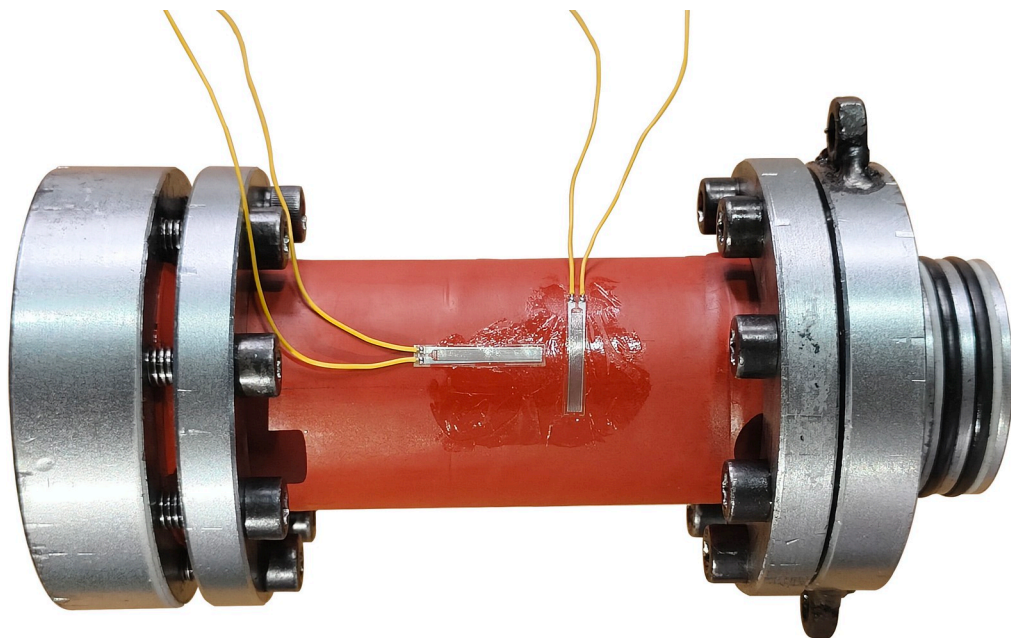

**Fig 4. Layout of external strain gauges on rock cores.**

<https://doi.org/10.1371/journal.pone.0317134.g004>

and effective stresses. Ensure that the injection pressure can effectively promote CO<sub>2</sub> injection without causing a reservoir fracture.

The experimental plans are listed in Table 1. Then injection pressure was gradually increased, and high-precision differential pressure sensors were used to record the pressure difference and flow rate changes, and monitor the real-time temperature of the experimental process through temperature sensors. Different temperature and pressure points were set according to the experimental requirements to simulate gas flow behavior at different depths and geological conditions. In addition, to reduce possible errors introduced by the experimental equipment, the seepage device was repeatedly calibrated and tested to ensure data reliability.

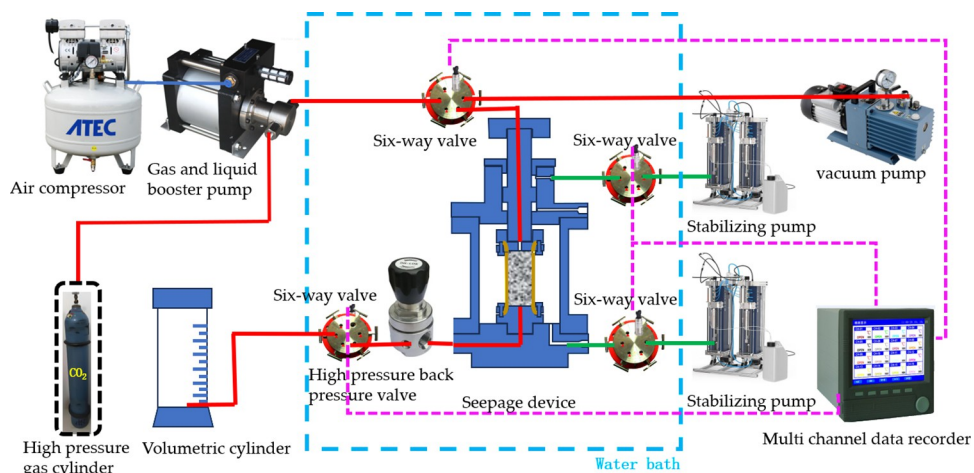

**Fig 5. Schematic of seepage experimental device.**

<https://doi.org/10.1371/journal.pone.0317134.g005>

Table 1. Experimental parameters.

| Sample status           | Injection pressure/MPa | confining pressure/MPa | Effective stress/MPa   |
|-------------------------|------------------------|------------------------|------------------------|
| Dry rock                | 2                      | 3→30                   | 1→3→5→7→10→13→18→23→28 |
| 0% NaCl saturated rock  | 4                      | 5→32                   |                        |
| 15% NaCl saturated rock | 6                      | 7→34                   |                        |
| 30% NaCl saturated rock | 8                      | 9→36                   |                        |
|                         | 10                     | 11→38                  |                        |

<https://doi.org/10.1371/journal.pone.0317134.t001>

The experimental process is illustrated in Fig 6. The sample was placed in a three-axis cavity under a constant and uniform confining pressure. After the temperature of the entire device remained constant at 35°C, CO<sub>2</sub> fluid at a predetermined pressure was injected into the permeation device for CO<sub>2</sub> permeation experiments.

The sandstone core was placed in a triaxial chamber and a stress of 1 MPa was applied in the vertical direction. The lateral and vertical stresses were alternately increased in steps of 1 MPa until both reached a set pressure. Inert helium gas was injected at a constant pressure (0.5 MPa) to remove air from the rock core. During this process, a gas leak check was conducted in the system. A vacuum pump was then used to remove the residual helium gas from the entire

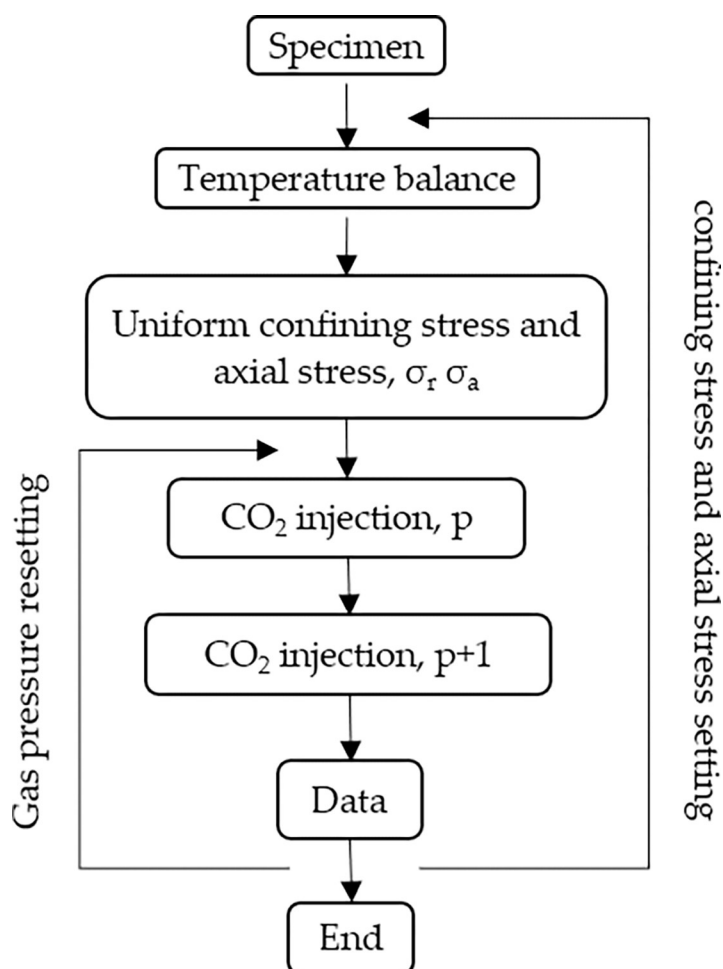

Fig 6. Experimental flowchart.

<https://doi.org/10.1371/journal.pone.0317134.g006>



system. Subsequently, CO<sub>2</sub> was injected into the system at an initial pressure of 1 MPa. When the gas flow rate in the outlet section was stable, seepage was considered to have reached equilibrium. After reaching a new equilibrium, CO<sub>2</sub> at a gas pressure of 2 MPa (1 MPa higher than the initial equilibrium pore pressure) was injected into the system for seepage until a new seepage equilibrium was reached. After completing the test under a CO<sub>2</sub> pressure of 1 MPa, the experiment was conducted according to Table 1, by repeating the same procedure.

**2.3.2. Calculation of permeability.** Accurate calculation of permeability is important to guarantee the accuracy of experimental data when conducting research on CO<sub>2</sub> injection into sandstones. The key factors to be considered in the permeability calculation method include the fluid viscosity, injection pressure, porosity, and permeability characteristics of sandstone. The permeability of the sandstone can be obtained through a comprehensive analysis of these parameters. The calculation method was based on Darcy's law to describe the infiltration flow, and the permeability of sand was determined based on the relationship between the flow rate and pressure drop.

The permeability was calculated using the following formula:

$$k = \frac{q_{ave} \mu_{ave} L}{A \Delta p} \times 10^5 \quad (1)$$

Where  $k$  is the permeability, mD;  $q_{ave}$  is the average gas flow rate through the core calculated at the average pore pressure, cm<sup>3</sup>/s;  $\mu_{ave}$  is the viscosity of the gas calculated at the average pore pressure of the experimental temperature, pa·s;  $L$  is the length of the rock core, cm;  $A$  is the cross-sectional area of the rock core, cm<sup>2</sup>;  $\Delta p$  is the difference in gas pressure between the upstream and downstream of the rock core,  $p_1 - p_2$ , MPa;

The relationship between the flow rates  $q_0$  and  $q_{ave}$  atmospheric pressure  $p_0$  is

$$\frac{(p_1 + p_2) q_{ave}}{2} = p_0 q_0 \quad (2)$$

The expression for gas permeability is

$$k = \frac{2 \mu_{ave} p_0 q_0 L}{(p_1^2 - p_2^2) A} \times 10^5 \quad (3)$$

In this study, the mass flow rate was used to calculate the permeability of gaseous and supercritical CO<sub>2</sub> in the rock cores. The flow rate of CO<sub>2</sub> is related to the flow rate of CO<sub>2</sub> at the outlet atmospheric pressure as follows:

$$\bar{\rho} q_{ave} = \rho_0 q_0 \quad (4)$$

Where:  $\bar{\rho}$  is the average density of gas in the rock core, kg·m<sup>-3</sup>,  $q_{ave}$  is the average flow rate of gas in the rock core, cm<sup>3</sup>/s;  $\bar{\rho}_0$  and  $q_0$  are the gas density and flow rate at atmospheric pressure, respectively, kg·m<sup>-3</sup>, cm<sup>3</sup>/s

The formula for calculating the permeability of rock cores in different CO<sub>2</sub> phases is as follows:

$$k = \frac{\mu_{ave} L q_0}{A \Delta p} \cdot \frac{\rho_0}{\bar{\rho}} \times 10^5 \quad (5)$$

For CO<sub>2</sub> in different phases, the impact of phase changes on viscosity was also considered. During the experiment, temperature correction coefficients were established for both gaseous and supercritical CO<sub>2</sub> to correct for the effect of temperature changes on the permeability calculations. Considering the intensified thermal motion of gas molecules at high temperatures



and the special properties of supercritical CO<sub>2</sub>, determination of the correction coefficient plays a decisive role in reflecting the true permeability.

The AP1700 material property query platform provides a large number of basic physical property parameters that can be used in the industry, and its data are consistent with those published by the National Institute of Standards and Technology (NIST) in the United States. The experimental gas CO<sub>2</sub> was selected to fit the relationship between gas viscosity, temperature, and pressure.

A graph was created after retrieving the CO<sub>2</sub> physical property parameters using the AP1700 material property query platform. Fig 7 shows the viscosity temperature pressure relationship surface graph from 0 to 7.38 MPa, 293.15 K to 373.15 K, and Fig 8 shows the viscosity temperature pressure relationship surface graph from 7.38 MPa to 20 MPa, 273.15 K to 373.15 K.

A polynomial expression was obtained by fitting the data using the least-squares method. As CO<sub>2</sub> is at a critical pressure of 7.38 MPa, the fitting region was divided into 0~7.38 MPa, 293.15 K~373.15 K, and 7.38 MPa~20 MPa, 273.15 K~373.15 K. The fitting is a fifth degree polynomial, and the viscosity calculation accuracy meets the requirements.

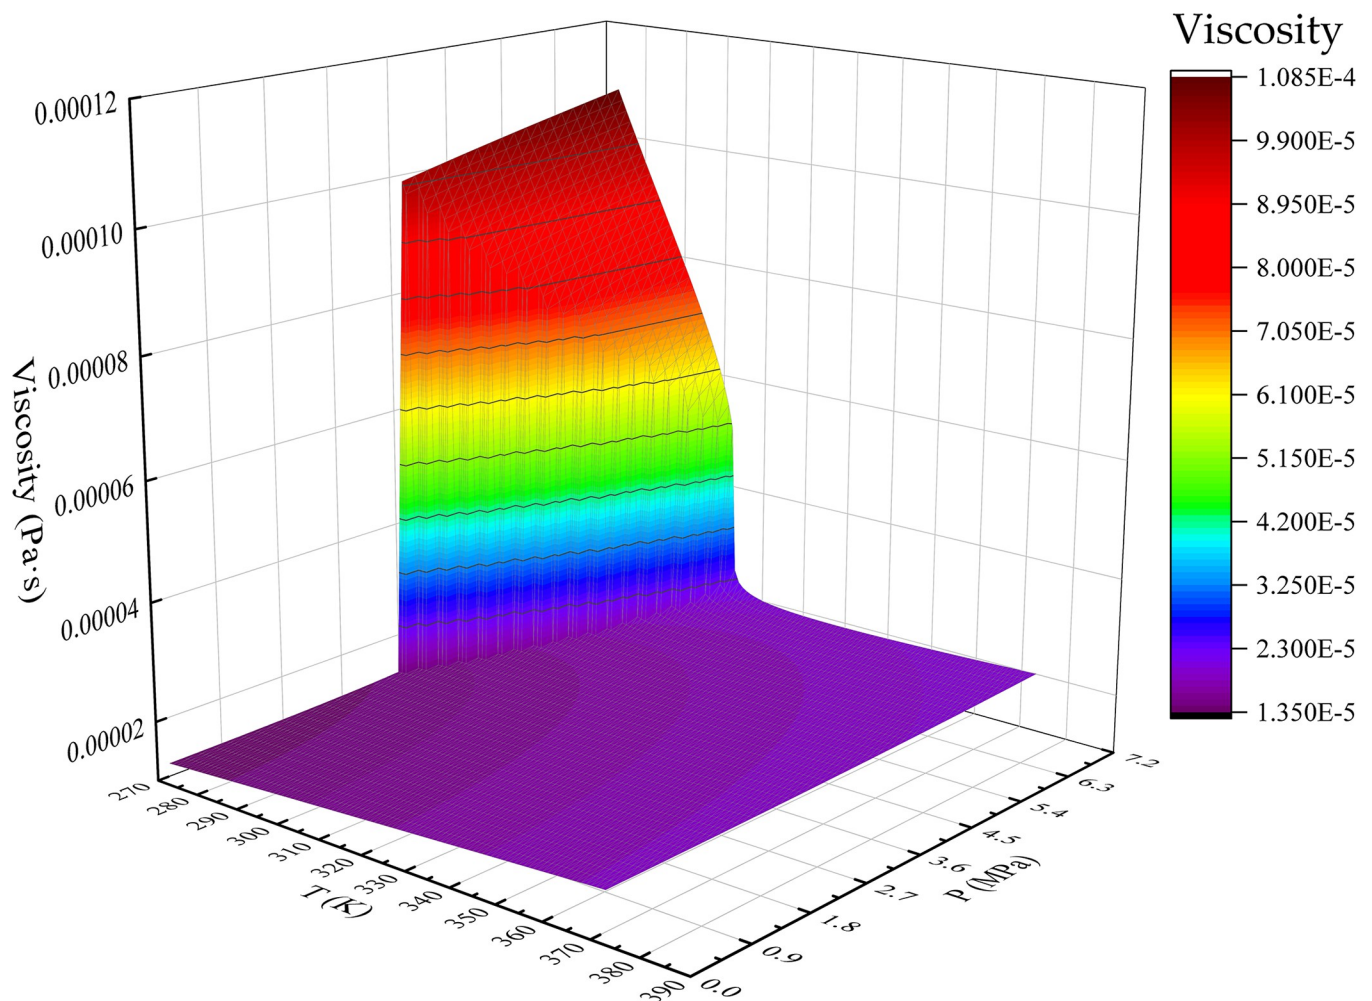

**Fig 7.** 0~7.38 MPa, 273.15 K~373.15 K CO<sub>2</sub> viscosity temperature pressure relationship surface.

<https://doi.org/10.1371/journal.pone.0317134.g007>

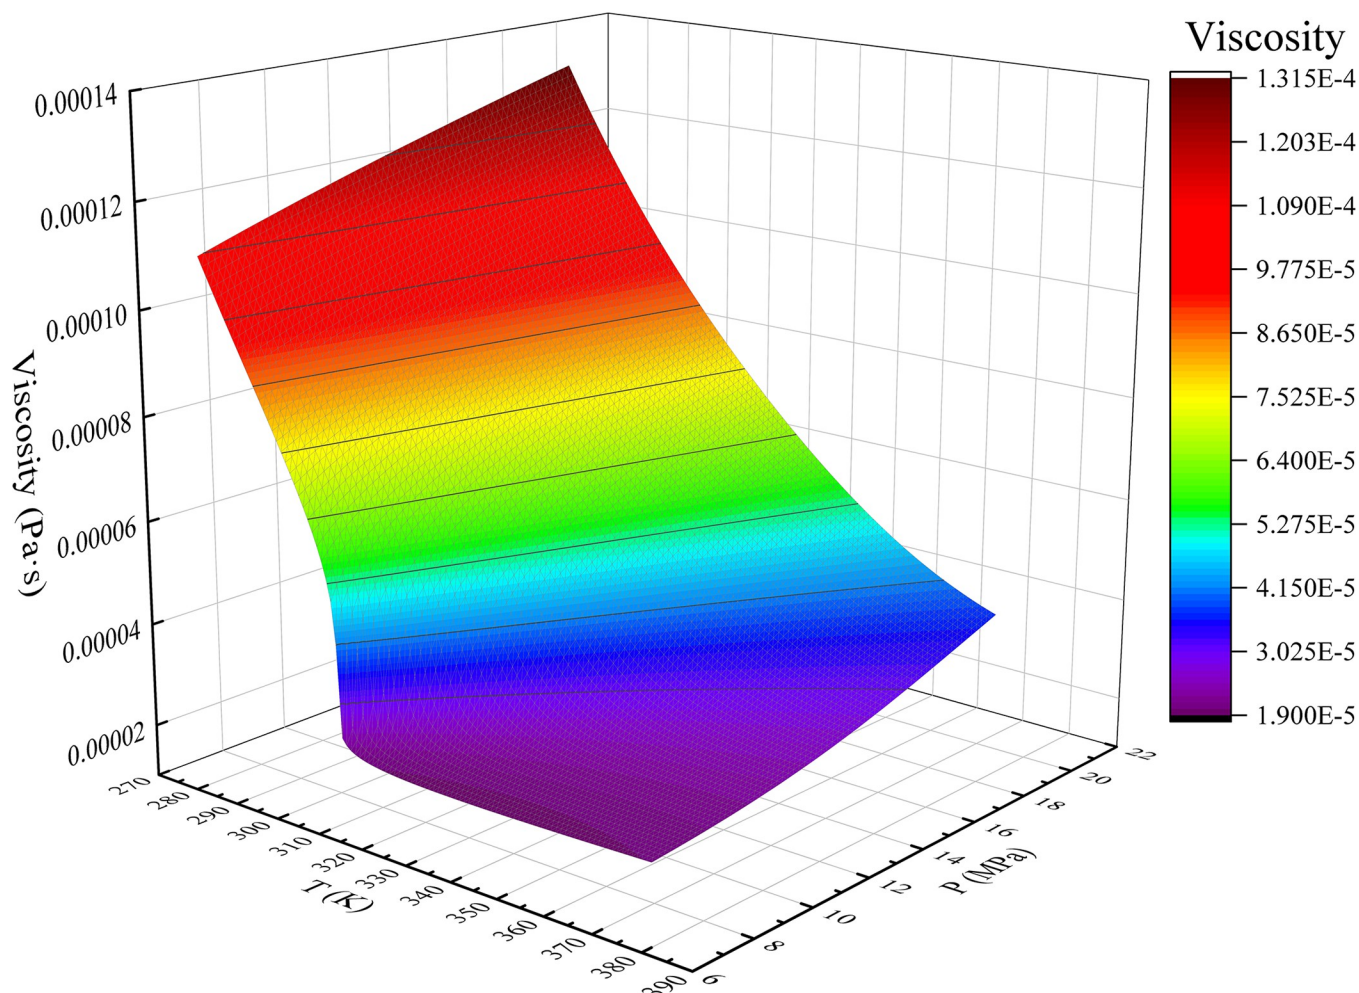

Fig 8. 7.38 MPa~20 MPa, 273.15 K~373.15 K CO<sub>2</sub> viscosity temperature pressure relationship surface.

<https://doi.org/10.1371/journal.pone.0317134.g008>

The temperature-pressure-viscosity relationship of CO<sub>2</sub> below the critical pressure is

$$\begin{aligned}
 f(\mu_g) = f(T, P) = & \\
 & a_1 + a_2T + a_3P + \\
 & a_4T^2 + a_5TP + a_6P^2 + \\
 & a_7T^3 + a_8T^2P + a_9TP^2 + a_{10}P^3 + \\
 & a_{11}T^4 + a_{12}T^3P + a_{13}T^2P^2 + a_{14}TP^3 + a_{15}P^4 + \\
 & a_{16}T^5P + a_{17}T^4P + a_{18}T^3P^2 + a_{19}T^2P^3 + a_{20}T^4P + a_{21}P^5
 \end{aligned} \tag{6}$$

$\mu_g$  is the viscosity of gaseous, pa·s;  $T$  is the gas temperature, K;  $P$  is the gas pressure, MPa.

Table 2. CO<sub>2</sub> viscosity temperature pressure relationship coefficient a.

| coefficient    | value     | coefficient     | value     | coefficient     | value     |
|----------------|-----------|-----------------|-----------|-----------------|-----------|
| a <sub>1</sub> | -1.35E-01 | a <sub>8</sub>  | -7.21E-08 | a <sub>15</sub> | -1.90E-06 |
| a <sub>2</sub> | 2.17E-03  | a <sub>9</sub>  | 2.69E-06  | a <sub>16</sub> | 4.72E-14  |
| a <sub>3</sub> | 1.20E-03  | a <sub>10</sub> | 1.03E-10  | a <sub>17</sub> | -3.63E-13 |
| a <sub>4</sub> | -1.40E-05 | a <sub>11</sub> | -7.32E-11 | a <sub>18</sub> | 1.34E-11  |
| a <sub>5</sub> | 1.12E-08  | a <sub>12</sub> | 3.05E-10  | a <sub>19</sub> | -2.10E-10 |
| a <sub>6</sub> | -2.49E-04 | a <sub>13</sub> | -1.04E-08 | a <sub>20</sub> | 4.45E-09  |
| a <sub>7</sub> | 4.53E-08  | a <sub>14</sub> | 7.86E-08  | a <sub>21</sub> | 2.21E-08  |

<https://doi.org/10.1371/journal.pone.0317134.t002>

The temperature-pressure-viscosity relationship of CO<sub>2</sub> above the critical pressure is

$$\begin{aligned}
 f(\mu_{g-sc}) = f(T, P) = & \\
 & b_1 + b_2 T + b_3 P + \\
 & b_4 T^2 + b_5 TP + b_6 P^2 + \\
 & b_7 T^3 + b_8 T^2 P + b_9 TP^2 + b_{10} P^3 + \\
 & b_{11} T^4 + b_{12} T^3 P + b_{13} T^2 P^2 + b_{14} TP^3 + b_{15} P^4 + \\
 & b_{16} T^5 P + b_{17} T^4 P + b_{18} T^3 P^2 + b_{19} T^2 P^3 + b_{20} T^4 P + b_{21} P^5
 \end{aligned} \quad (7)$$

The polynomial coefficients in Formulas (6) and (7) are shown in Tables 2 and 3.

By substituting (6) and (7) into (5) respectively, we can obtain the CO<sub>2</sub> sandstone seepage model considering the temperature gas pressure effect

$$\begin{aligned}
 k_g &= \frac{f(\mu_g)Lq_0}{A\Delta p} \cdot \frac{\rho_0}{\bar{\rho}} \times 10^5 \\
 p &\in (0 \text{ MPa}, 7.38 \text{ MPa}), K \in (273.15 \text{ K}, 373.15 \text{ K}) \\
 k_{g-sc} &= \frac{f(\mu_{g-sc})Lq_0}{A\Delta p} \cdot \frac{\rho_0}{\bar{\rho}} \times 10^5 \\
 p &\in (7.38 \text{ MPa}, 20 \text{ MPa}), K \in (273.15 \text{ K} \sim 373.15 \text{ K})
 \end{aligned} \quad (8)$$

The flow characteristics of CO<sub>2</sub> in sandstone media have a direct impact on the safety and efficiency of CO<sub>2</sub> geological storage. A new relationship between the temperature and super-critical CO<sub>2</sub> viscosity was introduced, and the model parameters were optimized through multiple iterations to achieve an accurate mathematical expression of the viscosity temperature pressure.

Table 3. CO<sub>2</sub> viscosity temperature pressure relationship coefficient b.

| coefficient    | value     | coefficient     | value     | coefficient     | value     |
|----------------|-----------|-----------------|-----------|-----------------|-----------|
| b <sub>1</sub> | 7.96E-12  | b <sub>8</sub>  | -4.84E-10 | b <sub>15</sub> | 1.21E-08  |
| b <sub>2</sub> | 7.18E-10  | b <sub>9</sub>  | -1.34E-09 | b <sub>16</sub> | 6.29E-16  |
| b <sub>3</sub> | -1.73E-11 | b <sub>10</sub> | 8.53E-12  | b <sub>17</sub> | -1.55E-15 |
| b <sub>4</sub> | 9.36E-09  | b <sub>11</sub> | -3.55E-13 | b <sub>18</sub> | -3.74E-13 |
| b <sub>5</sub> | 3.79E-11  | b <sub>12</sub> | 3.17E-12  | b <sub>19</sub> | 9.10E-12  |
| b <sub>6</sub> | 8.04E-10  | b <sub>13</sub> | 7.33E-11  | b <sub>20</sub> | -8.46E-11 |
| b <sub>7</sub> | 8.53E-12  | b <sub>14</sub> | -1.67E-09 | b <sub>21</sub> | 2.19E-10  |

<https://doi.org/10.1371/journal.pone.0317134.t003>

### 3. Results

#### 3.1. The influence of saltwater saturation on the permeability of sandstone injected with CO<sub>2</sub>

Fig 9 shows the relationship between the saltwater concentration and permeability evolution of the sandstone samples. After saltwater immersion, the permeability of the sandstone samples was approximately two orders of magnitude lower than that of the dry-rock samples. Fig 10(A) shows the relationship between the saltwater concentration and permeability. Fig 10(B) shows the change in permeability of the Berea samples studied by Glauer et al. [23]. The decrease of rock permeability after brine immersion was the same as the decrease of sandstone permeability from 1.60mD to 1.02mD after CO<sub>2</sub> action conducted by Zhang et al. [24] in the laboratory.

This phenomenon is related to the NaCl crystal content in the pore structure of the sandstone samples under different saltwater concentrations. Influenced by NaCl crystals, as the saltwater concentration increased, the degree of crystallization in the internal pores of the rock sample increased, which to some extent blocked the permeability channels, reduced the

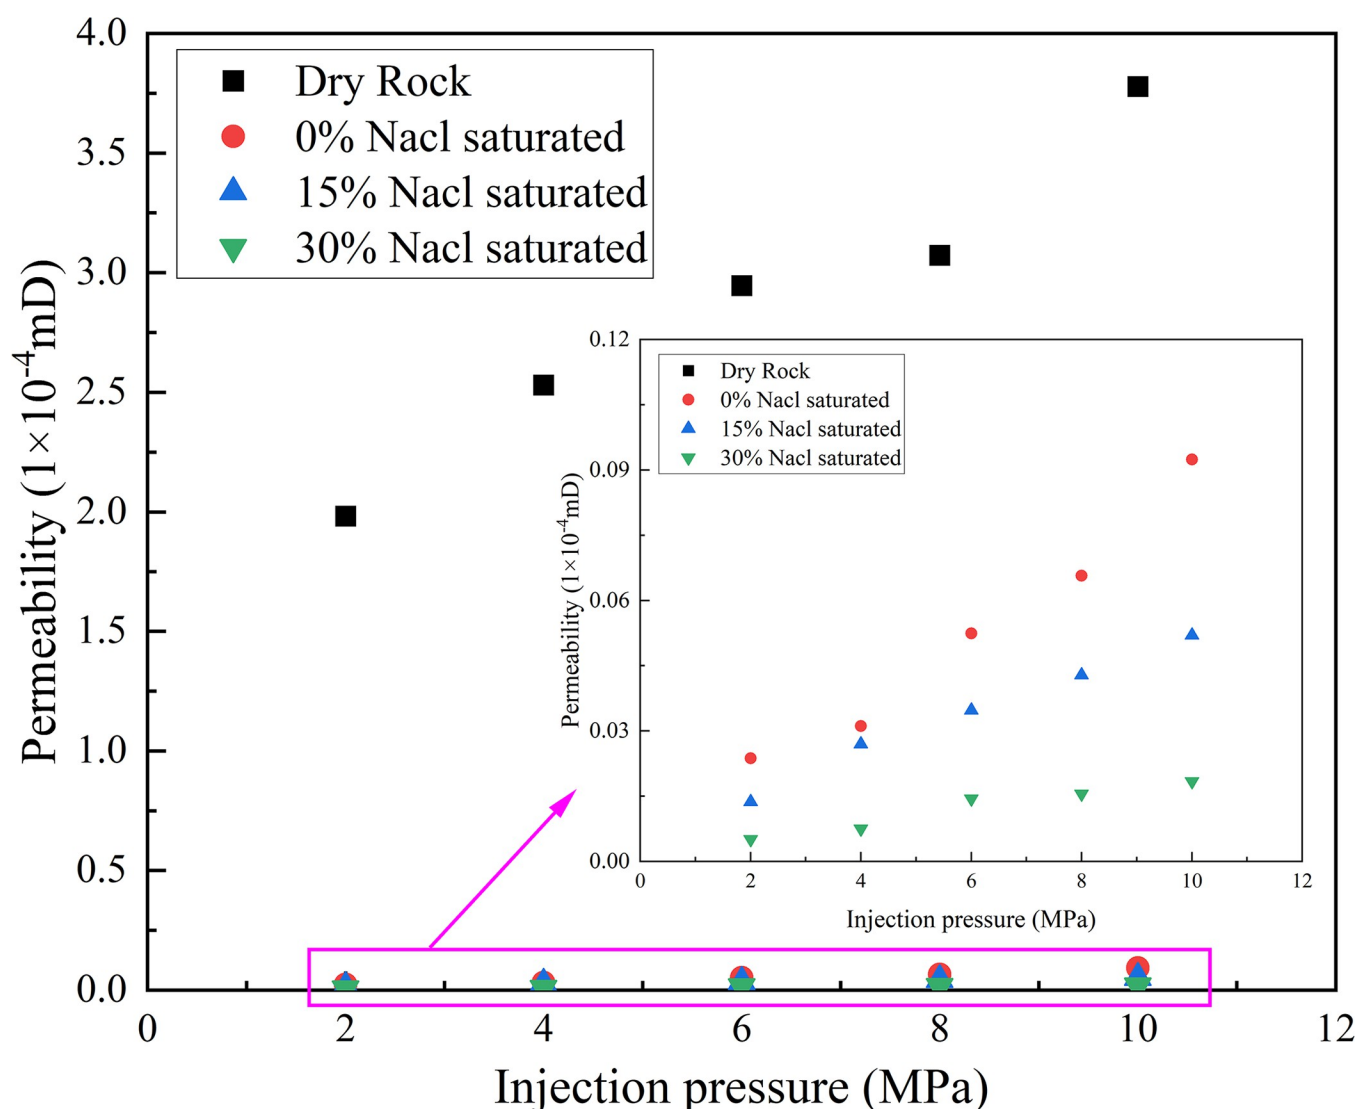

Fig 9. The relationship between different CO<sub>2</sub> injection pressures and sandstone permeability (confining pressure = 20 MPa).

<https://doi.org/10.1371/journal.pone.0317134.g009>



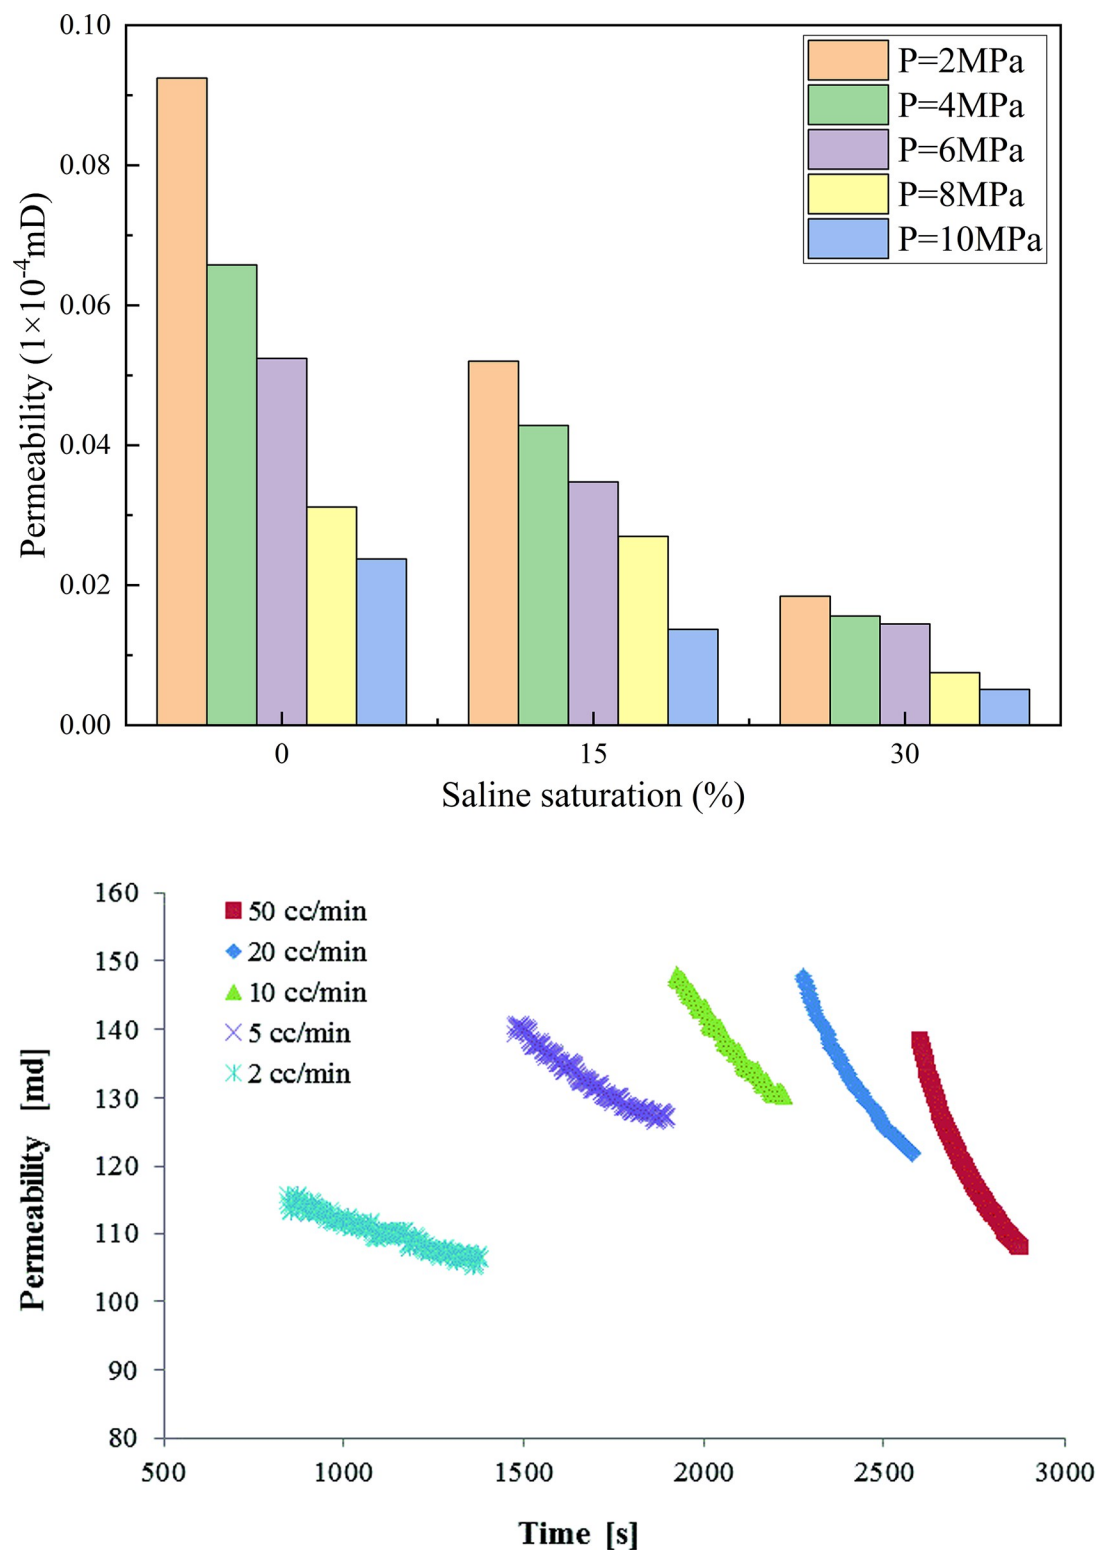

**Fig 10. The relationship between saltwater saturation and permeability.** (a) Variation in sandstone permeability. (b) Variation in Berea sandstone permeability reported by Iglaier et al. [23].

<https://doi.org/10.1371/journal.pone.0317134.g010>

permeability channels, and led to a decrease in permeability. This is consistent with the research results of Akindipe et al. [25] that with the injection of CO<sub>2</sub>, salt in rock pores began to crystallize, and these crystalline substances blocked rock pores, resulting in a significant decrease in permeability after CO<sub>2</sub> injection leads to an increase in water saturation, an increase in breakthrough pressure, and a decrease in the mechanical strength and elastic properties of the rock. These changes have an important impact on both the injectivity and storage capacity of CO<sub>2</sub> and must be fully considered in CO<sub>2</sub> geological storage projects [26, 27]. When the CO<sub>2</sub> injection pressure was 4MPa, the permeability of the dried sample was 81.2 times, 93.8 times, and 336.9 times that of the sandstone saturated with different concentrations of saline water. As the saline water concentration increased, the sandstone was subjected to stress during the initial stage of confining pressure loading, causing the pores to close and the saline filling between the cracks to be compressed, resulting in the blockage of the seepage channel and significant deformation of the cracks. The opening of the cracks decreased significantly, leading to a reduction in the seepage channels and permeability. Moreover, as the saline-water concentration increased, the blocking effect became more pronounced. Fig 11 shows the variation trend of the radial strain of the sandstone under different effective stresses.

### 3.2. The effect of effective stress on the permeability of saturated sandstone injected with CO<sub>2</sub>

Fig 12 shows the relationship between the effective stress and permeability of sandstone during CO<sub>2</sub> injection when saturated with different concentrations of NaCl. Under the same effective stress path conditions, the permeability of sandstone gradually decreased with an increase in osmotic pressure. This trend was generally observed under different effective stress conditions, which is consistent with the results of Wang et al. [28]. When the osmotic pressure was constant, the permeability of the sandstone gradually decreased with an increase in the effective stress and eventually plateaued. Ye et al. [29] and Nasvi et al. [30] showed in CO<sub>2</sub> injection experiments that increasing the effective stress in sandstone would lead to pore compression and subsequent permeability reduction. This phenomenon is critical for understanding the behavior of CO<sub>2</sub> in geologic storage and its impact on reservoir storage and injection capacity because the sandstone samples contained a large number of pores and fractures in the rock mass during the initial stress loading stage. As the effective stress increases from 1MPa to 7MPa, the compaction degree of the sample increased, and the pores and fractures were compressed. The diameters of the effective pores and seepage channels become increasingly smaller, resulting in a sharp decrease in permeability. As the effective stress continued to increase, the pore and fracture volumes of the sandstone were further compressed. When the effective stress was loaded to 13 MPa, the decrease in permeability slowed, mainly because the increase in confining pressure gradually reduced the compression effect of the pores and permeable channels. The diameter of the effective pores and permeable channels tends to be stable; therefore, the change in sandstone permeability gradually becomes flat.

Tables 4–7 show the decrease in permeability when the effective stress of sandstone increases under different conditions.

For example, when the osmotic pressure is 2MPa, the average decrease in permeability of dry sandstone is 9.71% as the effective stress increases from 1MPa to 28MPa; The average decrease in permeability of 0% saline saturated sandstone is 20.51%; The average decrease in permeability of sandstone saturated with 15% saltwater is 20.46%; The average decrease in permeability of sandstone saturated with 30% saline solution is 24.73%. As the concentration of saltwater increased, the permeability decreased further under conditions of increased stress. This is because the blocking effect of saltwater weakens the flow channel, resulting in different

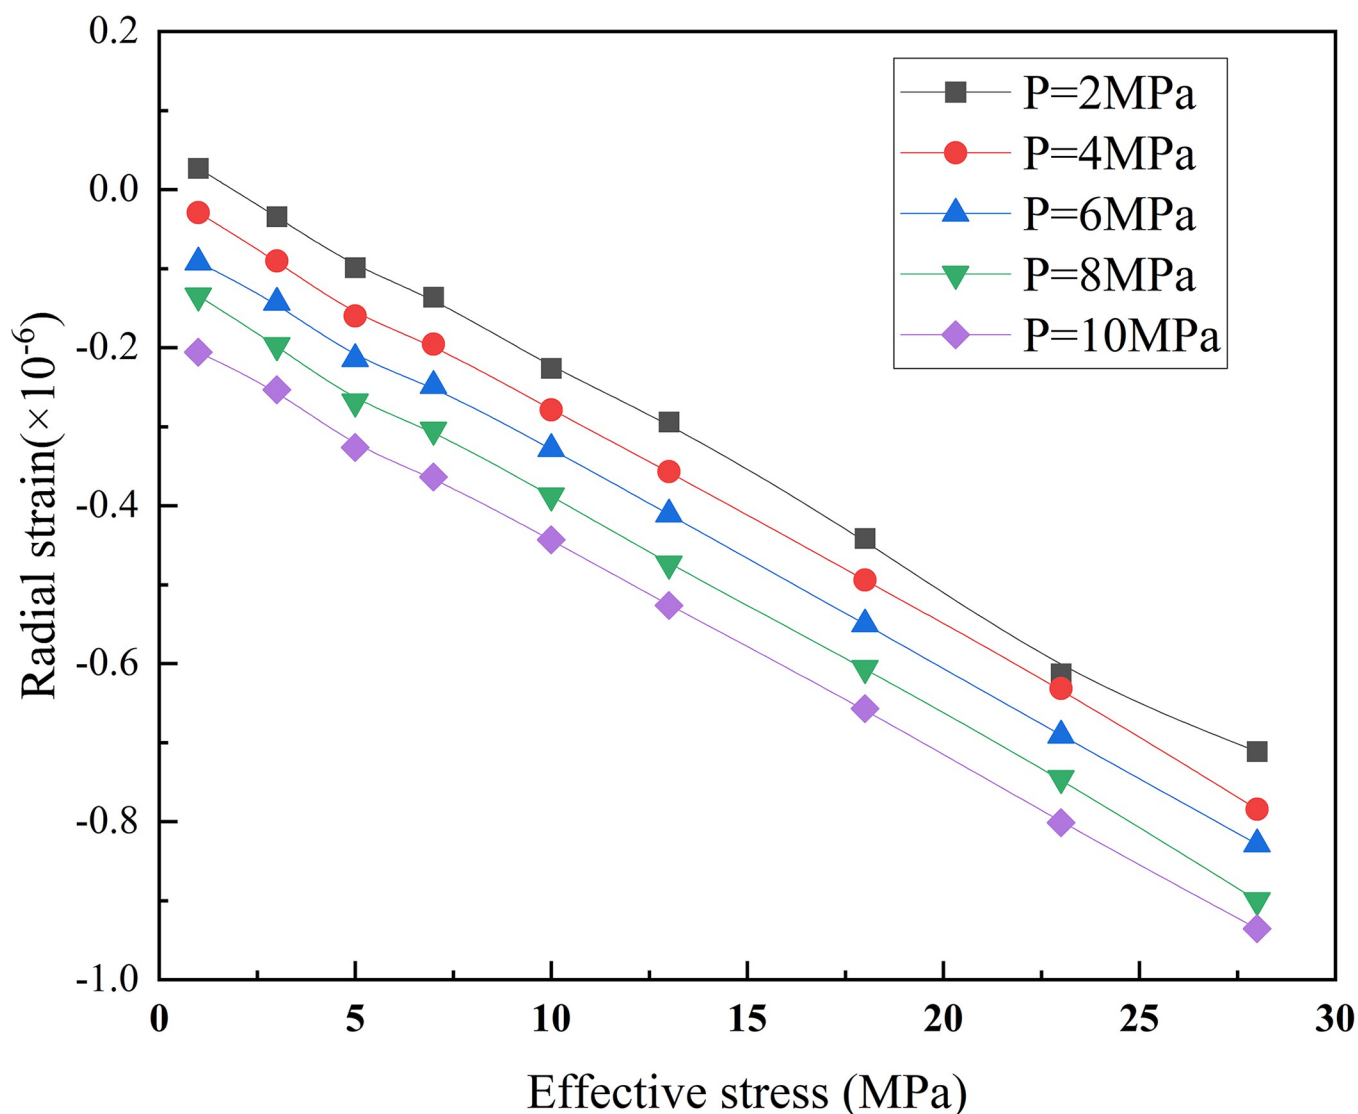

Fig 11. Sandstone radial strain under different effective stresses.

<https://doi.org/10.1371/journal.pone.0317134.g011>

effects of saltwater concentration on permeability. Under the coupling effect of stress and saltwater, the permeability decreased further. As the effective stress continues to increase, the compaction effect of pores and cracks gradually weakens, and the decrease rate of permeability relative to the initial stage slows down owing to the influence of saltwater concentration. Therefore, under the same osmotic pressure, the effective stress directly affected the permeability of the rock sample. As the effective stress increased, the permeability decreased, and the rate of decrease slowed down. At the same time, the difference in permeability between different concentrations of salt water saturated states and dry rock samples gradually decreases.

### 3.3. The influence mechanism of different concentrations of saline saturation on the permeability characteristics of sandstone

The increase in effective stress directly causes compression of rock fractures, resulting in a decrease in permeability. CO<sub>2</sub> sequestration often occurs in deep geological formations, where injected CO<sub>2</sub> is in a supercritical state. The relationship between permeability and effective

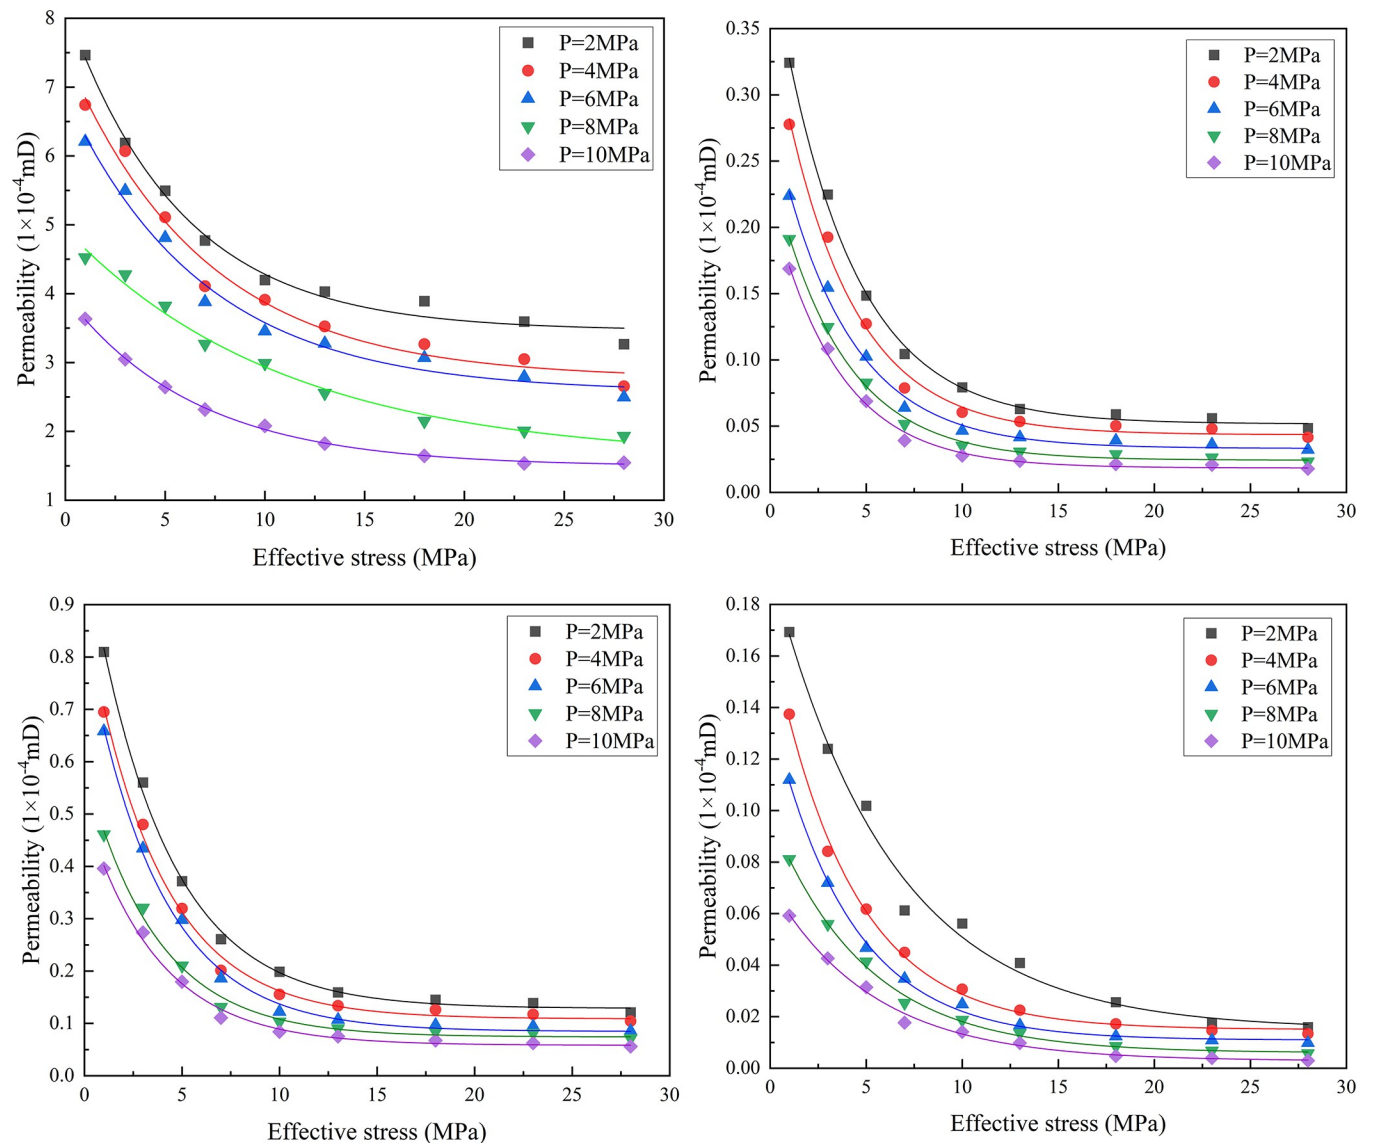

**Fig 12. Relationship curve between effective stress and permeability of sandstone.** (a) Dry rock; (b) 0%NaCl saturated; (c) 15%NaCl saturated; (d) 30%NaCl saturated.

<https://doi.org/10.1371/journal.pone.0317134.g012>

**Table 4. The decrease in sandstone permeability under different injection pressures as effective stress increases (Dry Rock).**

| Effective stress path/<br>MPa | injection pressure /MPa |        |        |        |        |
|-------------------------------|-------------------------|--------|--------|--------|--------|
|                               | 2                       | 4      | 6      | 8      | 10     |
| 1→3                           | 17.11%                  | 9.99%  | 11.48% | 5.47%  | 16.08% |
| 3→5                           | 11.20%                  | 15.82% | 12.43% | 10.65% | 13.31% |
| 5→7                           | 13.15%                  | 19.57% | 19.34% | 14.51% | 12.36% |
| 7→10                          | 12.03%                  | 4.82%  | 10.97% | 8.48%  | 10.26% |
| 10→13                         | 4.01%                   | 9.87%  | 5.16%  | 14.57% | 12.38% |
| 13→18                         | 3.44%                   | 7.30%  | 6.34%  | 15.89% | 9.78%  |
| 18→23                         | 7.63%                   | 6.67%  | 9.03%  | 6.63%  | 6.63%  |
| 23→28                         | 9.09%                   | 12.99% | 10.64% | 3.76%  | -0.65% |
| Average increase amplitude    | 9.71%                   | 10.88% | 10.67% | 9.99%  | 10.02% |

<https://doi.org/10.1371/journal.pone.0317134.t004>



Table 5. The decrease in sandstone permeability under different injection pressures as effective stress increases (0%NaCl saturated).

| Effective stress path/<br>Mpa | injection pressure /Mpa |        |        |        |        |
|-------------------------------|-------------------------|--------|--------|--------|--------|
|                               | 2                       | 4      | 6      | 8      | 10     |
| 1→3                           | 30.82%                  | 30.95% | 30.95% | 30.39% | 30.87% |
| 3→5                           | 33.64%                  | 33.42% | 34.45% | 34.52% | 34.42% |
| 5→7                           | 29.79%                  | 37.05% | 37.61% | 37.58% | 38.30% |
| 7→10                          | 23.90%                  | 22.78% | 34.25% | 21.36% | 24.14% |
| 10→13                         | 19.87%                  | 13.93% | 12.50% | 12.35% | 10.61% |
| 13→18                         | 8.80%                   | 5.71%  | 9.52%  | 7.04%  | 10.17% |
| 18→23                         | 4.39%                   | 7.07%  | 2.63%  | 3.03%  | 7.55%  |
| 23→28                         | 12.84%                  | 10.87% | 9.46%  | 12.50% | 10.20% |
| Average increase amplitude    | 20.51%                  | 20.22% | 21.42% | 19.85% | 20.78% |

<https://doi.org/10.1371/journal.pone.0317134.t005>

Table 6. The decrease in sandstone permeability under different injection pressures as effective stress increases (15%NaCl saturated).

| Effective stress path/<br>Mpa | injection pressure /Mpa |        |        |        |        |
|-------------------------------|-------------------------|--------|--------|--------|--------|
|                               | 2                       | 4      | 6      | 8      | 10     |
| 1→3                           | 30.69%                  | 30.66% | 30.97% | 34.72% | 35.78% |
| 3→5                           | 33.92%                  | 33.93% | 33.65% | 33.73% | 36.53% |
| 5→7                           | 29.67%                  | 38.13% | 37.68% | 37.72% | 43.17% |
| 7→10                          | 24.17%                  | 23.27% | 27.13% | 31.73% | 29.11% |
| 10→13                         | 20.63%                  | 11.48% | 10.64% | 12.68% | 14.29% |
| 13→18                         | 6.30%                   | 5.92%  | 5.95%  | 6.45%  | 10.42% |
| 18→23                         | 5.04%                   | 4.54%  | 7.59%  | 8.62%  | 2.33%  |
| 23→28                         | 13.27%                  | 13.40% | 10.96% | 11.32% | 14.29% |
| Average increase amplitude    | 20.46%                  | 20.17% | 20.57% | 22.12% | 23.24% |

<https://doi.org/10.1371/journal.pone.0317134.t006>

Table 7. The decrease in sandstone permeability under different injection pressures as effective stress increases (30%NaCl saturated).

| Effective stress path/<br>Mpa | injection pressure /Mpa |        |        |        |        |
|-------------------------------|-------------------------|--------|--------|--------|--------|
|                               | 2                       | 4      | 6      | 8      | 10     |
| 1→3                           | 26.78%                  | 38.74% | 35.73% | 31.09% | 27.96% |
| 3→5                           | 17.83%                  | 26.63% | 35.05% | 25.97% | 26.27% |
| 5→7                           | 39.86%                  | 27.22% | 25.62% | 38.78% | 43.74% |
| 7→10                          | 8.31%                   | 31.73% | 28.57% | 26.12% | 20.13% |
| 10→13                         | 27.21%                  | 26.55% | 32.81% | 27.20% | 30.61% |
| 13→18                         | 37.37%                  | 23.69% | 25.91% | 37.33% | 51.88% |
| 18→23                         | 31.80%                  | 14.76% | 12.30% | 20.78% | 16.02% |
| 23→28                         | 8.70%                   | 8.63%  | 9.32%  | 14.94% | 25.50% |
| Average increase amplitude    | 24.73%                  | 24.74% | 25.66% | 27.78% | 30.26% |

<https://doi.org/10.1371/journal.pone.0317134.t007>

stress is as follows [31]:

$$k = k_0 e^{-3C_f(\sigma - \sigma_0)} \quad (9)$$

Where  $k$  is sandstone permeability, mD;  $k_0$  is the initial permeability of sandstone, mD;  $\sigma$  is effective stress, MPa;  $\sigma_0$  is the initial effective stress, MPa;  $C_f$  is the compression coefficient of sandstone fractures, MPa<sup>-1</sup>.

Eq (9) can be transformed into [32]:

$$C_f = \frac{\ln(\frac{k}{k_0})}{-3(\sigma - \sigma_0)} \quad (10)$$

Using Eq (10), the fitting curves of the horizontal ( $\sigma - \sigma_0$ ) and vertical axes  $-1/3 \ln(\frac{k}{k_0})$  for a CO<sub>2</sub> injection pressure of 8 MPa were obtained, where the slope of the curve is the compression coefficient  $C_f$  of the sandstone fractures.

Fig 13 shows that sandstone with different water saturation levels was more prone to fracture compression during the initial compaction stage of 0–10 MPa ( $0.0538 \text{ MPa}^{-1} \sim 0.0611 \text{ MPa}^{-1}$ ). Although the initial permeability of each sample was different, their compression coefficients differed very little: when the effective stress increased from 10 to 28 MPa, the fracture compression coefficients under the action of 0%, 15%, and 30% saltwater concentrations were  $0.00495 \text{ MPa}^{-1}$ ,  $0.00614 \text{ MPa}^{-1}$ , and  $0.01879 \text{ MPa}^{-1}$ . Under the same effective stress, the

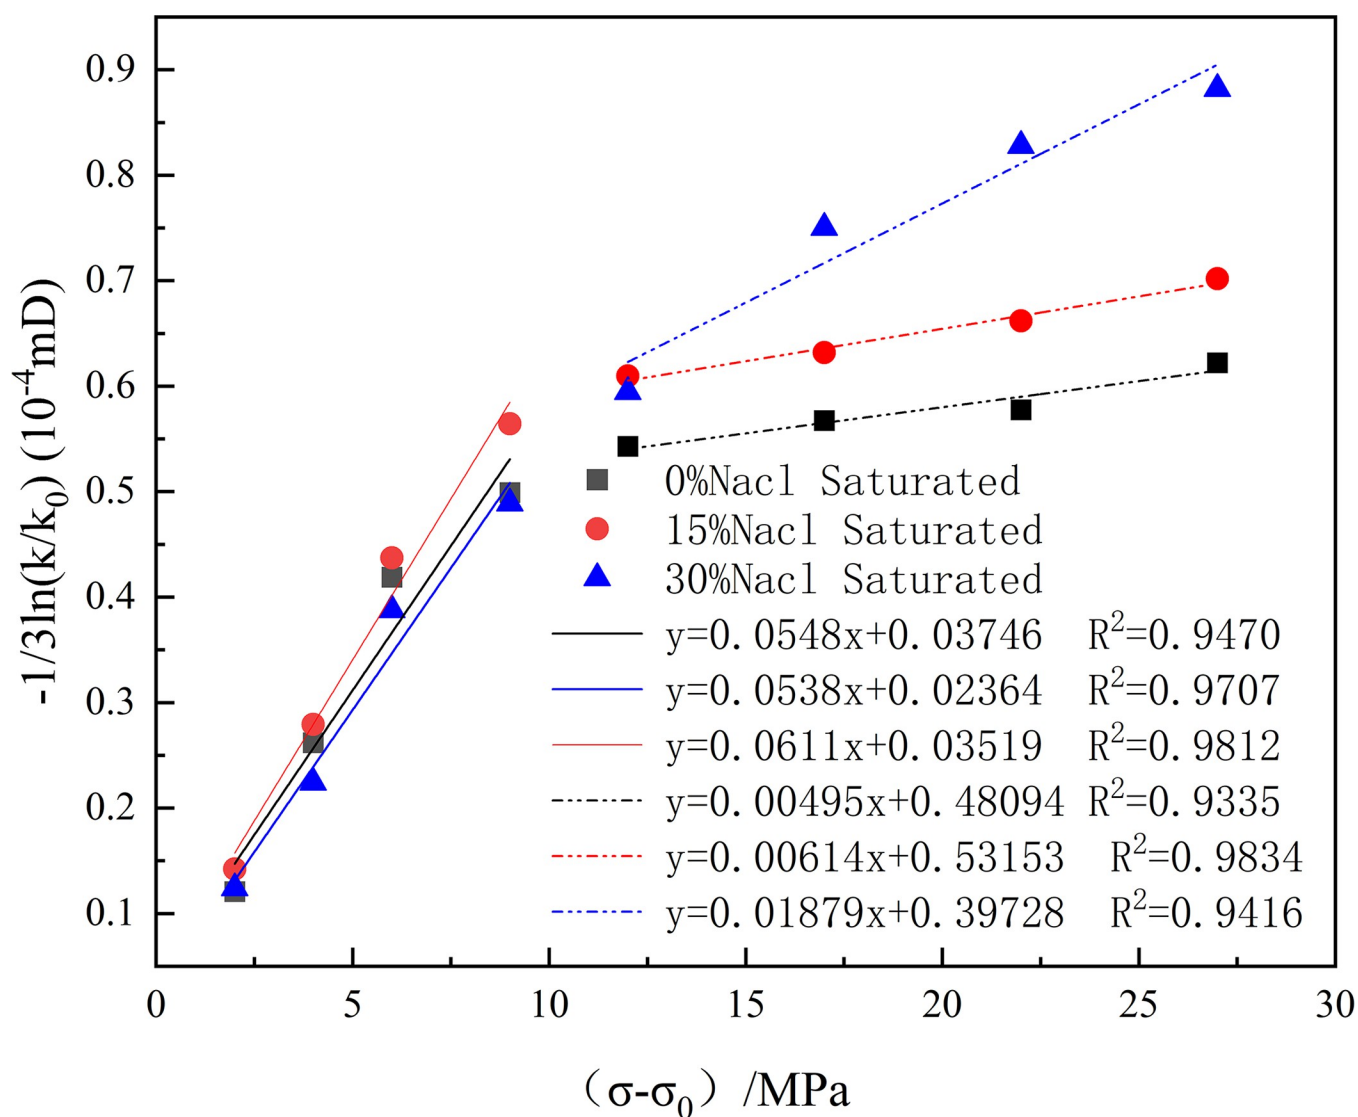

Fig 13. Curves of cleat compressibility computation.

<https://doi.org/10.1371/journal.pone.0317134.g013>

fracture compression coefficient increased with an increase in the saturated salt water concentration.

The function of effective stress is to cause compression effect in rock pores, thereby reducing the flow channels and lowering the permeability of sandstone. At the beginning of loading, the particles inside the sandstone were linearly compacted and underwent elastic deformation. When the loading stress increased to the rough contact strength of the particles, the rough contact was crushed and consolidated and the crushed particles began to fill the fracture space.

Permeability is also affected by the saltwater concentration. When the sandstone was saturated with saltwater, saltwater particles occupied the pore space of the sandstone. The higher the saltwater concentration, the more salt crystals there are inside the sandstone, and the more obvious the blocking effect, resulting in a decrease in permeability.

## 4. Conclusions

1. There is a good power function relationship between the permeability of reservoir sandstone and effective stress. During CO<sub>2</sub> injection into the reservoir sandstone, the permeability of dry sandstone was two orders of magnitude higher than that of saturated sandstone.
2. Injecting 8MPa CO<sub>2</sub> pressure into reservoir sandstone, the compression coefficient of sandstone fractures increases with the increase of effective stress from 10MPa to 28MPa.
3. The permeability of reservoir sandstone is affected by both effective stress and saturated saline concentration. The effective stress reduces the volume of the sandstone pores and fractures, resulting in a decrease in permeability. High-concentration saline produces a blocking effect by forming crystals inside sandstone fractures, whereas increasing the compression coefficient of sandstone fractures leads to a decrease in permeability.

## Author Contributions

**Funding acquisition:** Bing Liang.

**Investigation:** Guotao Shi, Bo Liang.

**Project administration:** Yangqi Ma.

**Supervision:** Bing Liang, Wei Ji Sun.

**Validation:** Xu Qin.

**Writing – original draft:** Yangqi Ma.

**Writing – review & editing:** Wei Ji Sun.

## References

1. Bing Z, Kaiqiang L, Wei Bo W, Longlong C, Hong W. Evaluation of Effective CO<sub>2</sub> Geological Sequestration Potential of Deep Saline Aquifer in Ordos Basin. *Unconventional Oil and Gas*. 2019; 6(03):15–20. <https://doi.org/CNKI:SUN:FCYQ.0.2019-03-004>
2. Jian X, Ning W, Ning W, Ke-ni Z, Mo X. Progress in leakage study of geological CO<sub>2</sub> storage. *Rock and Soil Mechanics*. 2017; 38(S1):181–8. <https://doi.org/10.16285/j.rsm.2017.S1.021>
3. Guanhua N, Zhao L, Yongzan W, Hehe J, Yixin L, Qiming H. Evolution of coalbed methane output and reservoir permeability under CO<sub>2</sub> injection. *Journal of Mining and Safety Engineering*. 2022; 39(04):837–46. <https://doi.org/10.13545/j.cnki.jmse.2021.0256>

4. Qinghe N, Liwen C, Xiaozhi Z. Experimental study of the influences of CO<sub>2</sub> injection on stress-strain and permeability of coal reservoir. *Coal Geology and Exploration*. 2018; 46(05):43–8. <https://doi.org/10.3969/j.issn.1001-1986.2018.05.007>
5. Shasha G, Yanbin W, Xiaoming N, Jun Y, Xianghao W. Study on Laws of Coal Seam Permeability Change in CO<sub>2</sub>-ECBM. *Coal Science and Technology*. 2014; 42(02):54–7+62. <https://doi.org/10.13199/j.cnki.cst.2014.02.016>
6. Li ZX, Fujii Y, Alam AKMB, Li ZH, Du F, Wei WJ. Implementing a simple 2D constitutive model for rocks into finite element method. *Comput Geotech*. 2024; 167. <https://doi.org/10.1016/j.compgeo.2024.106095> 001167900300001.
7. Yingting JU, Mian CHEN, Shuai Y. Experimental study on tensile strength of sandstone under biaxial compressive stress. *Petroleum Science Bulletin*. 2024; 9(03):513–24. <https://doi.org/10.3969/j.issn.2096-1693.2024.03.038>
8. Wang K, Chang CG. Study on the characteristics of CO<sub>2</sub> fracturing rock damage based on fractal theory. *Theor Appl Fract Mec*. 2024; 134. <https://doi.org/10.1016/j.tafmec.2024.104691> 001322193800001.
9. Wang K, Pan HY, Fujii Y. Study on energy distribution and attenuation of CO<sub>2</sub> fracturing vibration from coal-like material in a new test platform. *Fuel*. 2024; 356. <https://doi.org/10.1016/j.fuel.2023.129584> 001067615000001.
10. Hao JF, Guo CY, Sun WJ, Liang B, Qin B, Li LL. Study on the deterioration and damage evolution characteristics of mechanical properties of siltstone after supercritical CO<sub>2</sub> treatment. *J Co<sub>2</sub> Util*. 2024; 89. <https://doi.org/10.1016/j.jcou.2024.102972> 001356150800001.
11. Jianfeng H, Bing L, Weiji S, Qiaoqiao L, Pengcheng D. Gassy coal thermal-hydraulic-mechanical coupling model and numerical simulation considering adsorption/desorption thermal effect. *Journal of Mining and Safety Engineering*. 2020; 37(06):1282–90. <https://doi.org/10.13545/j.cnki.jmse.2020.06.024>
12. Yiwen L, Meilong F, Changquan W, Shijing X, Fankun M, Yanlai S, Yu L. Influence of different injection methods of CO<sub>2</sub> flooding on flow capacity of low permeability reservoirs. *Petroleum Geology and Recovery Efficiency*. 2024; 31(02):79–85. <https://doi.org/10.13673/j.pgare.202307008>
13. Shuming L, Xiang Z, Zhen L. Modeling of sandstone microscopic pore structure and numerical analysis of carbon dioxide seepage paths. *Engineering Journal of Wuhan University*. 2024; 57(04):411–9. <https://doi.org/10.14188/j.1671-8844.2024-04-003>
14. Zhenbao L, Fengshuang W, Rui L, Haizhang Z, Jihao M, Gaoming W. Seepage characteristic and mechanism during liquid CO<sub>2</sub> displacing CH<sub>4</sub> in coal seam. 2022; 39(06):1265–71. <https://doi.org/10.13545/j.cnki.jmse.2021.0332>
15. Liu Q, Li JL, Liang B, Liu JJ, Sun WJ, He J, et al. Complex wettability behavior triggering mechanism on imbibition: A model construction and comparative study based on analysis at multiple scales. *Energy*. 2023; 275. <https://doi.org/10.1016/j.energy.2023.127434> 000981688900001.
16. Liu Q, Li JL, Liang B, Sun WJ, Liu JJ, Lei Y. Microscopic Flow of CO<sub>2</sub> in Complex Pore Structures: A Recent 10-Year Review. *Sustainability-Basel*. 2023; 15(17). <https://doi.org/10.3390/su151712959> 001064154700001.
17. Sun WJ, Li JL, Liu Q, Liang B, Liu JJ, Lei Y. Complexity upgrade and triggering mechanism of mixed-wettability: Comparative study of CO<sub>2</sub> displacement in different phases. *Fuel*. 2024; 369. <https://doi.org/10.1016/j.fuel.2024.131798> 001236222200001.
18. Bing B, Mian C, Yan J. Mechanism of hydro-mechanical-thermal field coupling for supercritical CO<sub>2</sub> seepage. *Scientia Sinica (Physica, Mechanica and Astronomica)*. 2023; 53(02):101–13. <https://doi.org/10.1360/SSPMA-2022-0226>
19. Teng T, Wei W, Fang S, Pengfei Z. Experimental study of the seepage behavior of CO<sub>2</sub> in raw coal under coupled pressures and temperature condition. *Journal of China University of Mining and Technology*. 2019; 48(04):760–7. <https://doi.org/10.13247/j.cnki.jcumat.001031>
20. Li SH, Zhang SC, Xing HL, Zou YS. CO-brine-rock interactions altering the mineralogical, physical, and mechanical properties of carbonate-rich shale oil reservoirs. *Energy*. 2022; 256. <https://doi.org/10.1016/j.energy.2022.124608> 000827466600003.
21. Fairhurst CE, Hudson JAJ, JoRM, Science M, Abstracts G. Draft ISRM suggested method for the complete stress-strain curve for intact rock in uniaxial compression. *International Journal of Rock Mechanics and Mining Sciences and Geomechanics*. 1999; 36(3):281–9. [https://doi.org/10.1016/S0148-9062\(99\)00006-6](https://doi.org/10.1016/S0148-9062(99)00006-6)
22. Massah M, Sun D, Sharifi H, Englezos P. Demonstration of gas-hydrate assisted carbon dioxide storage through horizontal injection in lab-scale reservoir. *J Chem Thermodyn*. 2018; 117:106–12. <https://doi.org/10.1016/j.jct.2017.09.019> 000418494200015.



23. Iglaue S, Sarmadivaleh M, Al-Yaseri A, Lebedev M. Permeability evolution in sandstone due to injection of CO<sub>2</sub>-saturated brine or supercritical CO<sub>2</sub> at reservoir conditions. *Energy Procedia*. 2014; 63:3051–9. <https://doi.org/10.1016/j.egypro.2014.11.328>
24. Zhang LW, Soong Y, Dillmore R, Lopano C. Numerical simulation of porosity and permeability evolution of Mount Simon sandstone under geological carbon sequestration conditions. *Chem Geol*. 2015; 403:1–12. <https://doi.org/10.1016/j.chemgeo.2015.03.014> 000353832800001.
25. Akindipe D, Saraji S, Piri M. Salt precipitation during geological sequestration of supercritical CO<sub>2</sub> in saline aquifers: A pore-scale experimental investigation. *Advances in Water Resources*. 2021; 155:104011. <https://doi.org/10.1016/j.advwatres.2021.104011>
26. Lamy-Chappuis B, Angus D, Fisher Q, Grattoni C, Yardley BWD. Rapid porosity and permeability changes of calcareous sandstone due to CO<sub>2</sub>-enriched brine injection. *Geophysical Research Letters*. 2014; 41(2):399–406. <https://doi.org/10.1002/2013GL058534>
27. SP A, SB B. Hydrologic and geomechanical characterization of deep sedimentary rocks and basement for safe carbon sequestration in the Cook Inlet Basin, Alaska—ScienceDirect. *International Journal of Greenhouse Gas Control*. 2020; 106. <https://doi.org/10.1016/j.ijggc.2020.103243>
28. Wang H-y. Study on Slippage Effect and Stress Sensitivity of Tight Sandstone. Singapore: Springer Nature Singapore; 2023. p. 82–9.
29. Ye B, Ni X, Zhang Y, Ye W. Supercritical CO<sub>2</sub> Permeability in Rock: An Experiment Study. Singapore: Springer Singapore; 2018. p. 280–8.
30. Nasvi MCM, Ranjith PG, Sanjayan J, Haque A. Sub- and super-critical carbon dioxide permeability of wellbore materials under geological sequestration conditions: An experimental study. *Energy*. 2013; 54:231–9. <https://doi.org/10.1016/j.energy.2013.01.049> 000319371600022.
31. Guiqiang Z, Biaocan L, Xuezheng Z, Defang Y. Laboratory study and prediction on coal permeability of Qinshui basin. *Journal of North China Institute of Science and Technology*. 2014; 11(02):67–73. <https://doi.org/10.3969/j.issn.1672-7169.2014.02.013>
32. Shida C, Dazhen T, Lijun G, Hao X, Junlong Z, Shu T. Control of effective stress on permeability in high-rank coal reservoirs. *Coal Geology and Exploration*. 2017; 45(04):76–80. <https://doi.org/10.3969/j.issn.1001-1986.2017.04.013>
